# Supplementary material for: Tuning the net topology of a ternary Ag(i)-1,2,4,5-tetra(4-pyridyl)benzene-carboxylate framework: structures and photoluminescence
Source: Royal Society of Chemistry journal article supplement (doi:10.1039/c9ce01155b), 2019-01-01
Supplement: c9ce01155b1.pdf [file c9ce01155b1.pdf]

Supporting Information

**Tuning the Net Topology of Ternary  
Ag(I)-1,2,4,5-Tetra(4-pyridyl)benzene-Carboxylate  
Framework: Structures and Photoluminescence**

Wei Liu,<sup>\*a</sup> Cong-Cong Chen,<sup>a</sup> Ling-Ling Mao,<sup>b</sup> Si-Guo Wu,<sup>b</sup> Long-Fei Wang<sup>b</sup> and  
Ming-Liang Tong<sup>b</sup>

a. College of Materials and Energy, South China Agricultural University, Guangzhou,  
P. R. China

b. Key Laboratory of Bioinorganic and Synthetic Chemistry of Ministry of Education,  
School of Chemistry, Sun Yat-Sen University, Guangzhou, P. R. China

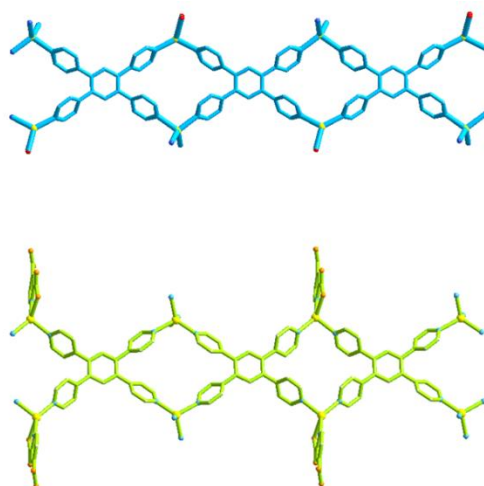

**Figure S1.** Two kinds of  $[\text{Ag}_2(\text{bztpy})]_\infty$  chains that forms the whole framework of **3**. One chain (marked by blue) is composed of bztpy ligand, Ag1 and Ag2, whereas the other chain (marked by green) is composed of bztpy ligand, Ag2 and Ag3.

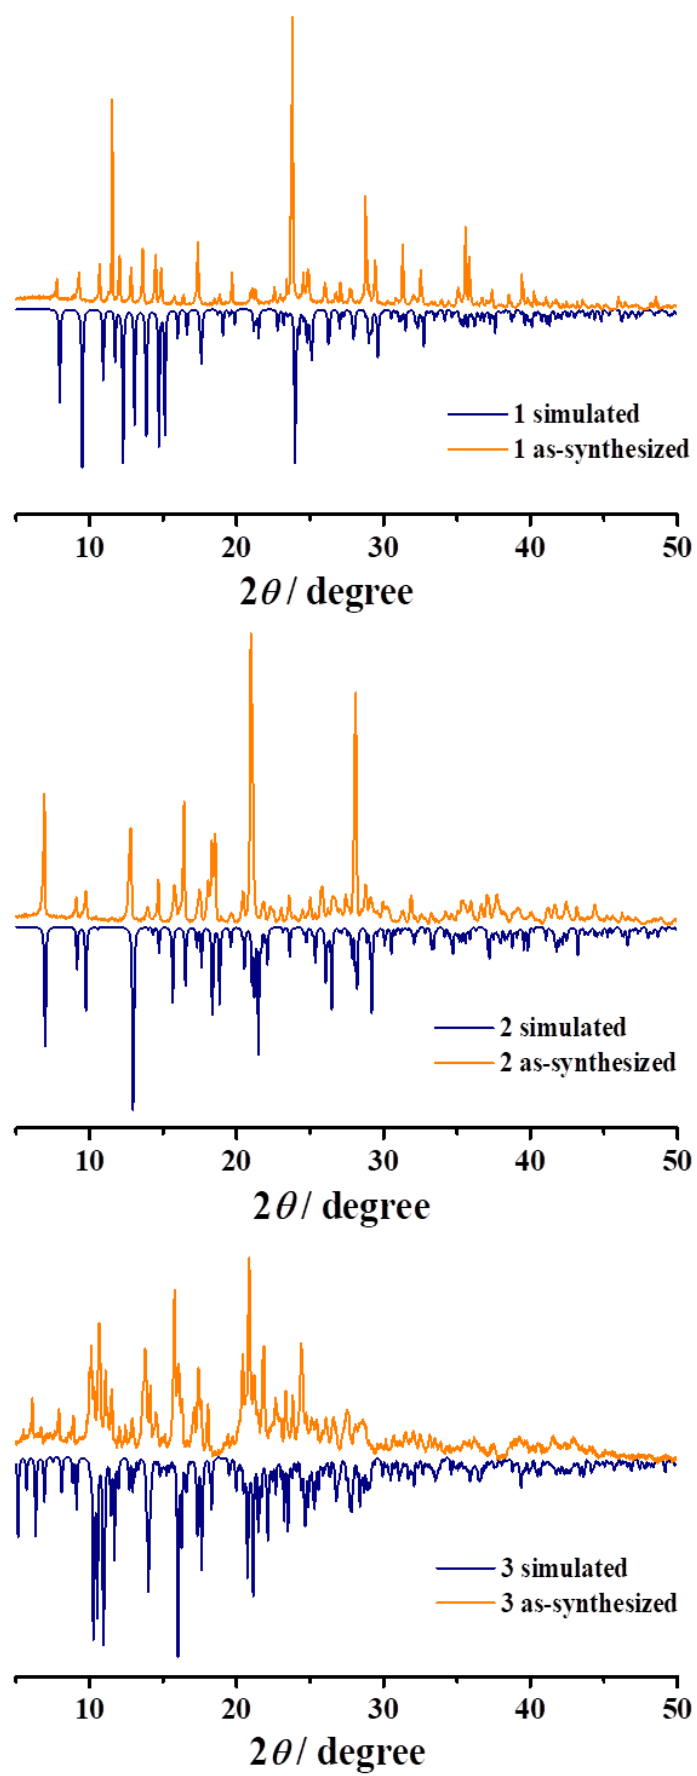

**Figure S2.** PXRD data as well as the simulated ones.

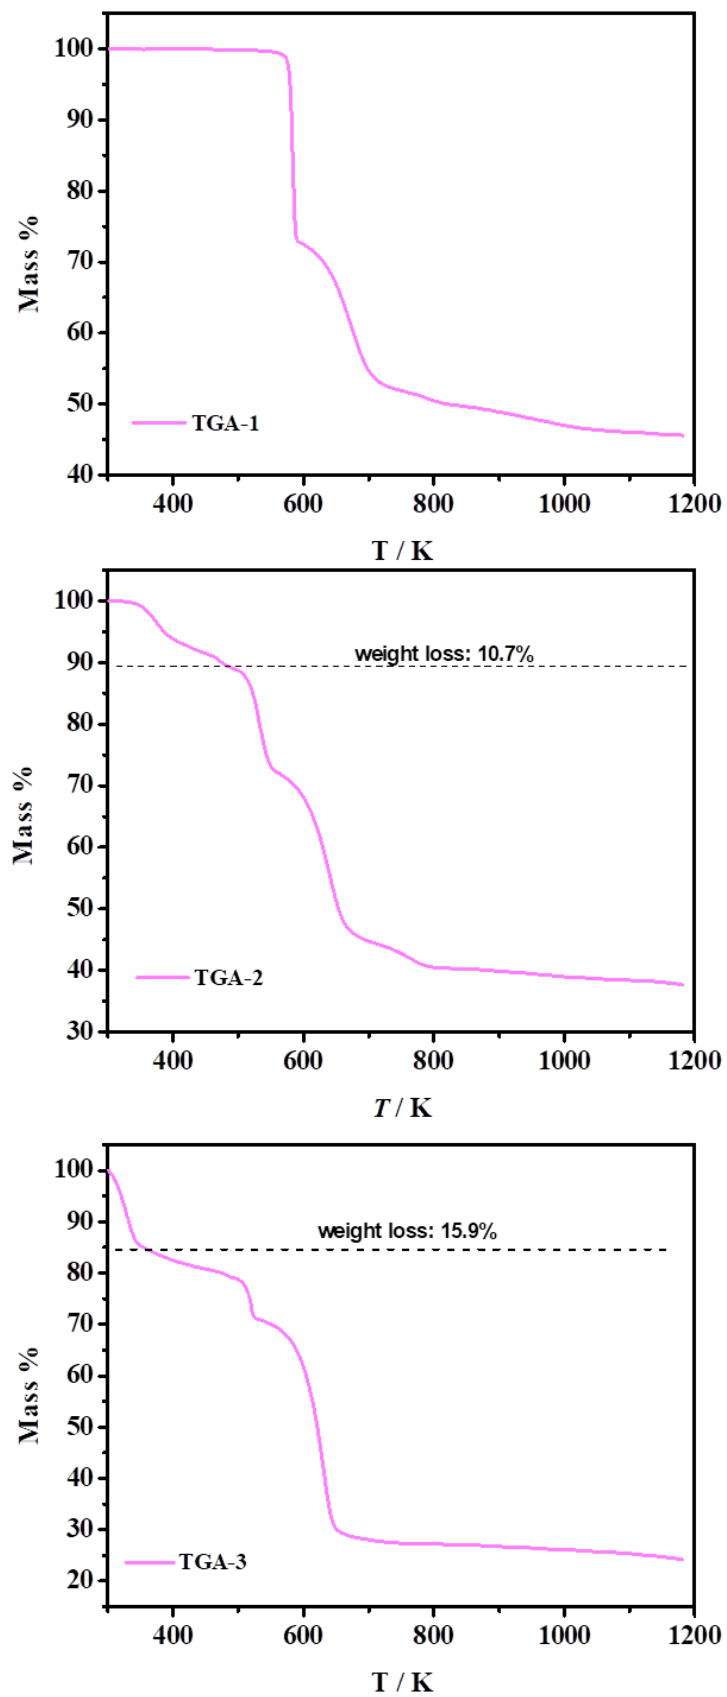

**Figure S3.** Thermogravimetric analyses.

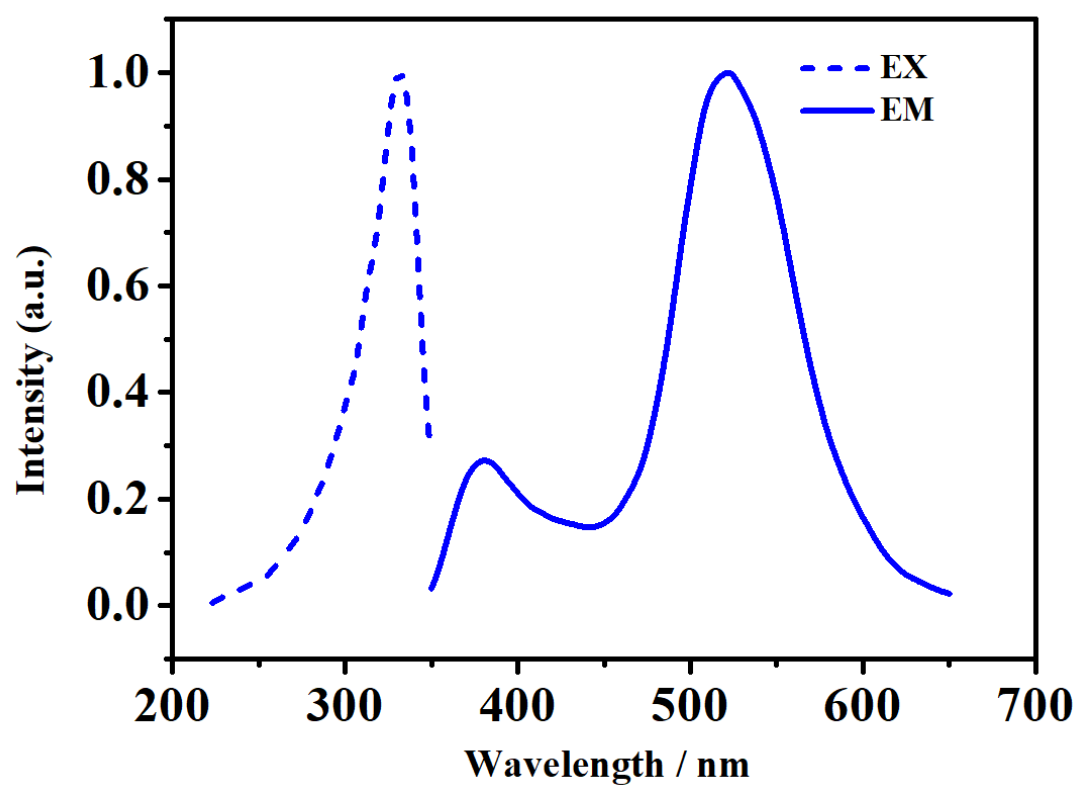

**Figure S4.** The solid state excitation and emission spectra bztpy ligands at room temperature.

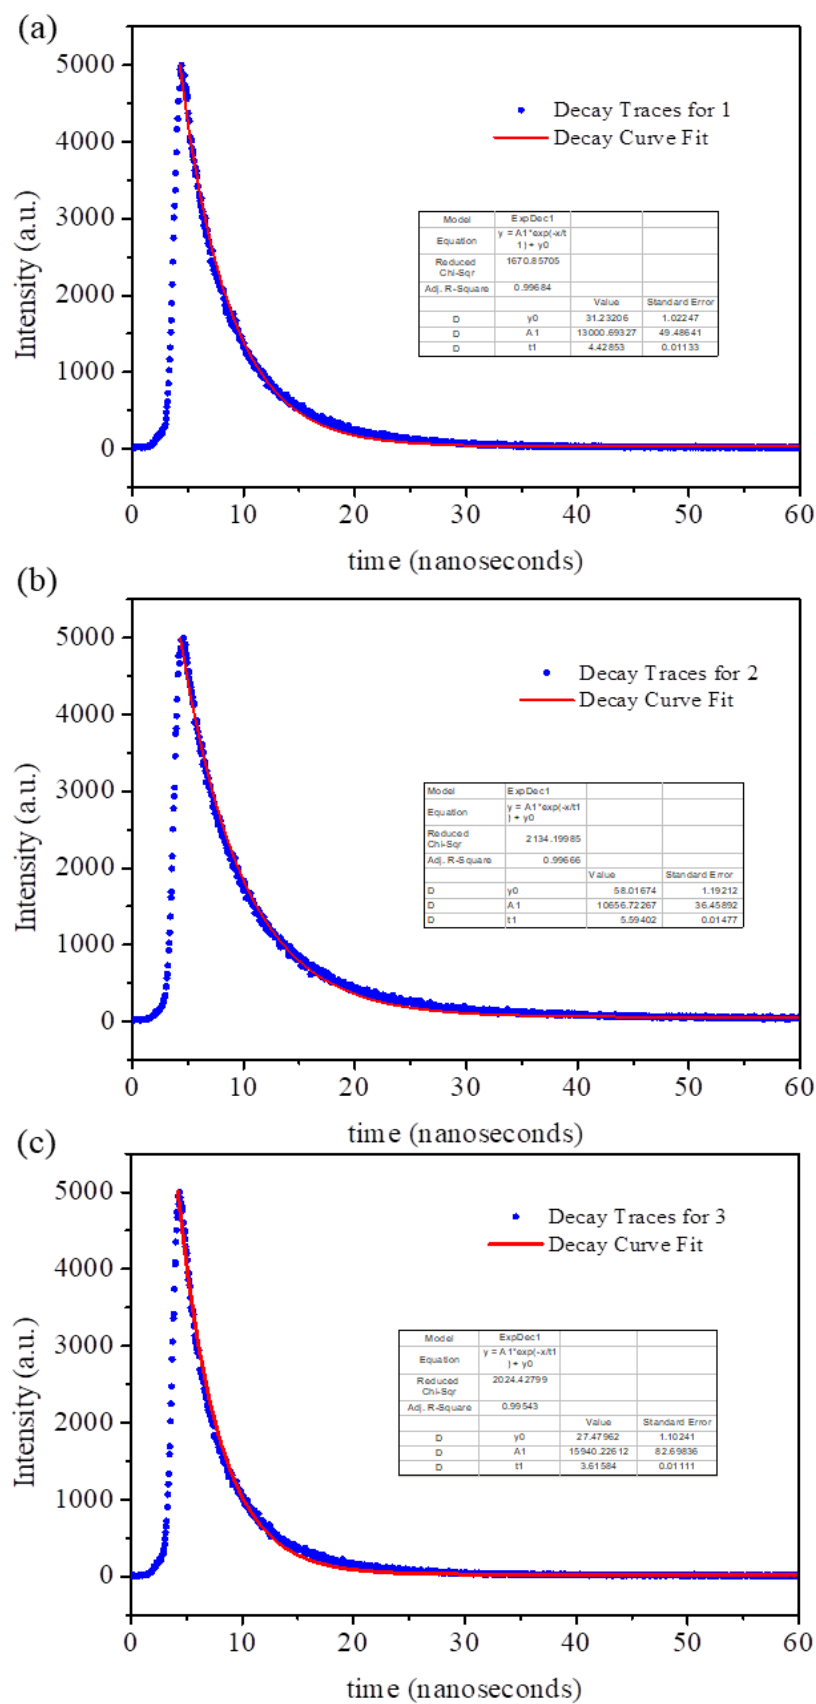

**Figure S5.** Emission decay curves of **1** (4.43 ns, *top*), **2** (5.59 ns, *middle*) and **3** (3.62 ns, *bottom*).

**Table S1.** Crystallographic data of **1-3**.

| Compound reference                                              | <b>1</b>                                                        | <b>2</b>                                                                      | <b>3</b>                                                                             |
|-----------------------------------------------------------------|-----------------------------------------------------------------|-------------------------------------------------------------------------------|--------------------------------------------------------------------------------------|
| Chemical formula                                                | C <sub>20</sub> H <sub>14</sub> AgN <sub>2</sub> O <sub>2</sub> | C <sub>36</sub> H <sub>34</sub> Ag <sub>2</sub> N <sub>4</sub> O <sub>8</sub> | C <sub>68.5</sub> H <sub>70.5</sub> N <sub>9.5</sub> Ag <sub>3</sub> O <sub>15</sub> |
| Formula Mass                                                    | 422.20                                                          | 866.41                                                                        | 1590.45                                                                              |
| Temperature / K                                                 | 120(2)                                                          | 150(2)                                                                        | 120(2)                                                                               |
| Crystal system                                                  | triclinic                                                       | monoclinic                                                                    | triclinic                                                                            |
| Space group                                                     | <i>P</i> -1                                                     | <i>Cc</i>                                                                     | <i>P</i> -1                                                                          |
| <i>a</i> / Å                                                    | 8.2278(6)                                                       | 18.1253(7)                                                                    | 13.8004(6)                                                                           |
| <i>b</i> / Å                                                    | 9.2785(8)                                                       | 19.3124(10)                                                                   | 17.5129(6)                                                                           |
| <i>c</i> / Å                                                    | 11.2960(11)                                                     | 10.4700(4)                                                                    | 18.7660(8)                                                                           |
| $\alpha$ / °                                                    | 83.923(7)                                                       | 90                                                                            | 67.675(4)                                                                            |
| $\beta$ / °                                                     | 78.995(7)                                                       | 112.6240(10)                                                                  | 76.215(4)                                                                            |
| $\gamma$ / °                                                    | 84.363(6)                                                       | 90                                                                            | 68.734(4)                                                                            |
| <i>V</i> / Å <sup>3</sup>                                       | 839.05(13)                                                      | 3382.9(3)                                                                     | 3883.2(3)                                                                            |
| <i>Z</i>                                                        | 2                                                               | 4                                                                             | 2                                                                                    |
| $\mu(\text{MoK}\alpha)$ / mm <sup>-1</sup>                      | 1.216                                                           | 1.217                                                                         | 0.796                                                                                |
| reflns collected                                                | 8811                                                            | 14657                                                                         | 74961                                                                                |
| independent reflns                                              | 3701                                                            | 7211                                                                          | 17432                                                                                |
| <i>R</i> <sub>int</sub>                                         | 0.0935                                                          | 0.0399                                                                        | 0.0935                                                                               |
| <i>R</i> <sub>I</sub> <sup>a</sup> ( <i>I</i> > 2σ( <i>I</i> )) | 0.0377                                                          | 0.0386                                                                        | 0.0688                                                                               |
| <i>wR</i> <sub>2</sub> <sup>b</sup> (all data)                  | 0.0907                                                          | 0.0907                                                                        | 0.1681                                                                               |
| GOF                                                             | 1.061                                                           | 1.041                                                                         | 1.024                                                                                |

$$^a R_1 = \sum ||F_o| - |F_c|| / \sum |F_o|, \quad ^b wR_2 = [\sum w(F_o^2 - F_c^2)^2 / \sum w(F_o^2)^2]^{1/2}$$
